# Supplementary material for: Synthesis of Bi2S3–Bi2O3 composites and their enhanced photosensitive properties
Source: Royal Society of Chemistry journal article supplement (doi:10.1039/c3ra46283h), 2013-12-18
Supplement: c3ra46283h.pdf [file c3ra46283h.pdf]

## Supporting Information Available

### Synthesis of the $\text{Bi}_2\text{S}_3\text{-Bi}_2\text{O}_3$ Composites and Their Enhanced Photosensitive Property

Fangyuan Lu,<sup>[a]</sup> Renxiong Li,<sup>[a]</sup> Nengjie Huo,<sup>[a]</sup> Juehan Yang,<sup>[a]</sup> Chao Fan,<sup>[a]</sup> Xiaozhou Wang,<sup>[b]</sup> Shengxue Yang,<sup>\*[a]</sup> and Jingbo Li<sup>\*[a]</sup>

**Synthesis of pure  $\text{Bi}_2\text{S}_3$  product:** In the typical experiment, 0.3 g of surfactant PVP and 0.75 g  $\text{Bi}(\text{NO}_3)_3 \cdot 5\text{H}_2\text{O}$  were first dissolved in 30 ml of distilled water, and then 0.24 g of  $\text{Na}_2\text{S} \cdot 9\text{H}_2\text{O}$  was added slowly to the solution. The solution was stirred about 10 min. Then the whole mixture was transferred into a 50 ml Teflon-lined autoclave, sealed and heated at 150 °C for 24 h. The final precipitates were collected and washed with deionized water and pure ethanol several times and dried in the air at 80 °C.

**Synthesis of pure  $\text{Bi}_2\text{O}_3$  product:** In the typical experiment, 0.3 g of surfactant PVP and 0.75 g  $\text{Bi}(\text{NO}_3)_3 \cdot 5\text{H}_2\text{O}$  were first dissolved in 30 ml of distilled water, and then filled a certain amount of  $\text{NH}_3 \cdot \text{H}_2\text{O}$  to adjust the pH value to 11. Afterward, the whole mixture was transferred into a 50 ml Teflon-lined autoclave, sealed and heated at 150 °C for 24 h. The final precipitates were collected and washed with deionized water and pure ethanol several times and dried in the air at 80 °C.

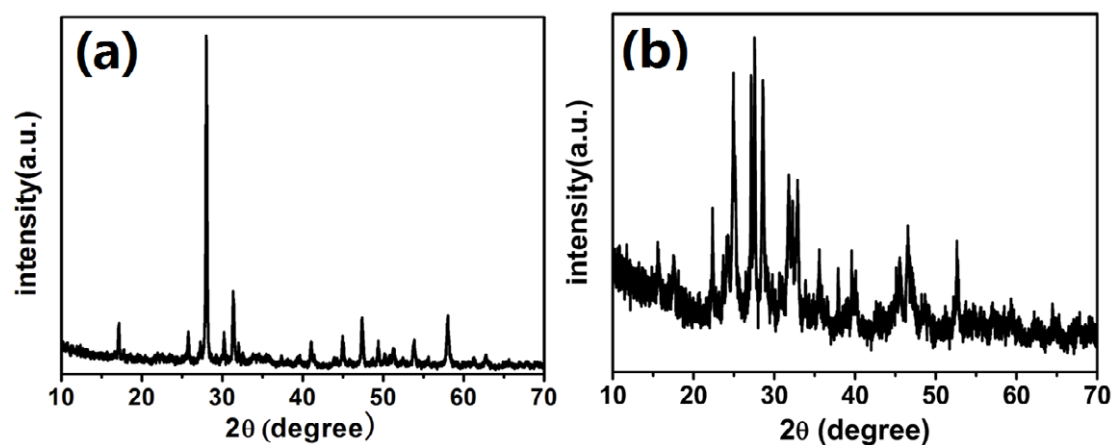

Figure S1. XRD patterns of the as-obtained samples: (a) pure  $\text{Bi}_2\text{O}_3$  and (b) pure  $\text{Bi}_2\text{S}_3$ .

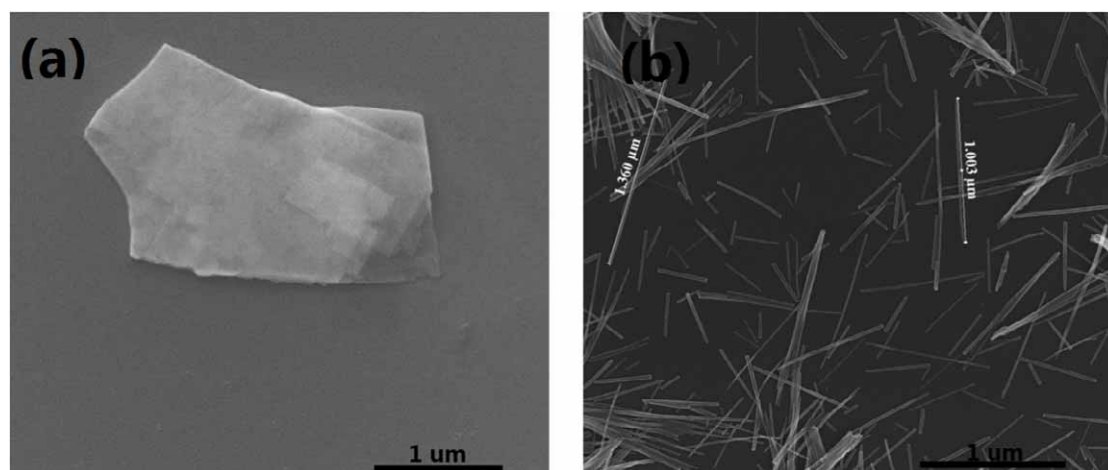

Figure S2. SEM images of the as-obtained samples: (a) pure  $\text{Bi}_2\text{O}_3$  and (b) pure  $\text{Bi}_2\text{S}_3$ .

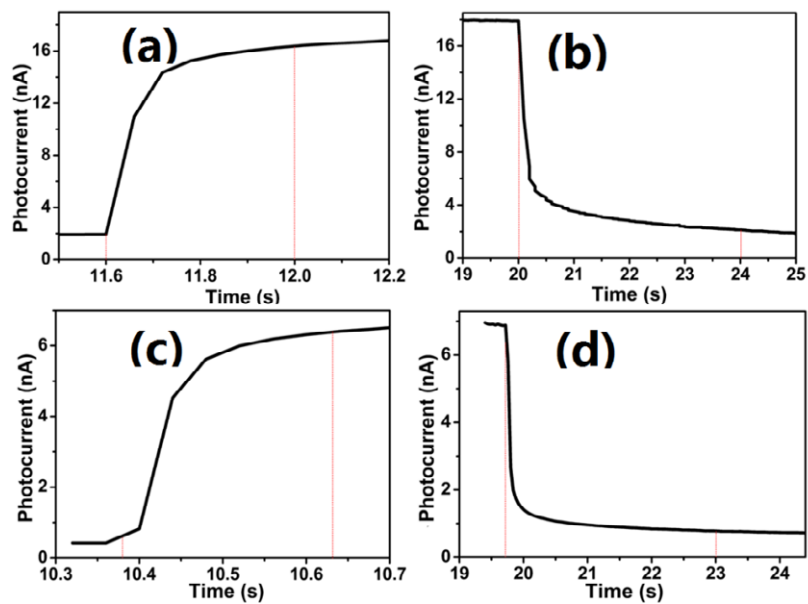

**Figure S3.** The enlarged view of photocurrent vs time curves under vacuum condition: (a) response time and (b) recovery time in  $\text{Bi}_2\text{S}_3$  based device, (c) response time and (d) recovery time in mechanical mixture of  $\text{Bi}_2\text{S}_3$  and  $\text{Bi}_2\text{O}_3$  based device.
